## RESEARCH ARTICLE

# Use of Thrombodynamics for revealing the participation of platelet, erythrocyte, endothelial, and monocyte microparticles in coagulation activation and propagation

E. N. Lipets<sup>1,2\*</sup>, O. A. Antonova<sup>3</sup>, O. N. Shustova<sup>3</sup>, K. V. Losenkova<sup>4</sup>, A. V. Mazurov<sup>3</sup>, F. I. Ataulakhanov<sup>1,2,5,6</sup>

**1** Department of Biophysics, Dmitry Rogachev National Medical Research Center of Pediatric Hematology, Oncology and Immunology, Moscow, Russian Federation, **2** Center for Theoretical Problems of Physicochemical Pharmacology, Russian Academy of Sciences, Moscow, Russian Federation, **3** Institute of Experimental Cardiology, National Medical Research Center for Cardiology, Russian Ministry of Health, Moscow, Russian Federation, **4** Medicity Research Laboratory, University of Turku, Turku, Finland, **5** Faculty of Physics, Lomonosov Moscow State University, Moscow, Russian Federation, **6** Moscow Institute of Physics and Technology, Dolgoprudny, Moscow Region, Russian Federation

\* [li\\_len@list.ru](mailto:li_len@list.ru)

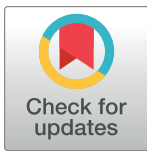

## OPEN ACCESS

**Citation:** Lipets EN, Antonova OA, Shustova ON, Losenkova KV, Mazurov AV, Ataulakhanov FI (2020) Use of Thrombodynamics for revealing the participation of platelet, erythrocyte, endothelial, and monocyte microparticles in coagulation activation and propagation. PLoS ONE 15(5): e0227932. <https://doi.org/10.1371/journal.pone.0227932>

**Editor:** Arijit Biswas, Institute of Experimental Hematology and Transfusion Medicine, University Clinic of Bonn, GERMANY

**Received:** December 25, 2019

**Accepted:** May 13, 2020

**Published:** May 29, 2020

**Copyright:** © 2020 Lipets et al. This is an open access article distributed under the terms of the [Creative Commons Attribution License](https://creativecommons.org/licenses/by/4.0/), which permits unrestricted use, distribution, and reproduction in any medium, provided the original author and source are credited.

**Data Availability Statement:** All relevant data are within the manuscript and its Supporting Information files.

**Funding:** The study was supported by the Ministry of Science and Higher Education of the Russian Federation (project-18-118012390250-0) and by the Russian Foundation for Basic Research together with National Center for Scientific

## Abstract

### Background and objective

For many pathological states, microparticles are supposed to be one of the causes of hypercoagulation. Although there are some indirect data about microparticles participation in coagulation activation and propagation, the integral hemostasis test Thrombodynamics allows to measure microparticles participation in these two coagulation phases directly. Demonstrates microparticles participation in coagulation activation by influence on the appearance of coagulation centres in the plasma volume and the rate of clot growth from the surface with immobilized tissue factor. Methods: Microparticles were obtained from platelets and erythrocytes by stimulation with thrombin receptor-activating peptide (SFLLRN) and calcium ionophore (A23187), respectively, from monocytes, endothelial HUVEC culture and monocytic THP cell culture by stimulation with lipopolysaccharides. Microparticles were counted by flow cytometry and titrated in microparticle-depleted normal plasma in the Thrombodynamics test.

### Results

Monocyte microparticles induced the appearance of clotting centres through the TF pathway at concentrations approximately 100-fold lower than platelet and erythrocyte microparticles, which activated plasma by the contact pathway. For endothelial microparticles, both activation pathways were essential, and their activity was intermediate. Monocyte microparticles induced plasma clotting by the appearance of hundreds of clots with an extremely slow growth rate, while erythrocyte microparticles induced the appearance of a few clots with a growth rate similar to that from surface covered with high-density tissue factor. Patterns of clotting induced by platelet and endothelial microparticles were intermediate.

Research of France (grant 19-51-15004 to Ataullakhanov F.I.). The funders had no role in study design, data collection and analysis, decision to publish, or preparation of the manuscript.

**Competing interests:** The authors have declared that no competing interests exist.

Platelet, erythrocyte and endothelial microparticles impacts on the rate of clot growth from the surface with tissue factor did not differ significantly within the 0–200·10<sup>3</sup>/ul range of microparticles concentrations. However, at concentrations greater than 500·10<sup>3</sup>/ul, erythrocyte microparticles increased the stationary clot growth rate to significantly higher levels than do platelet microparticles or artificial phospholipid vesicles consisting of phosphatidylcholine and phosphatidylserine.

## Conclusion

Microparticles of different origins demonstrated qualitatively different characteristics related to coagulation activation and propagation.

## Introduction

Cell destruction or activation leads to microparticles (MPs) shedding. In the blood of normal donors, more than 80% of MPs are derived from platelets [1,2]. In pathological states the MPs concentration and origin may change.

There are a number of clinical works where the MPs concentration is shown to increase in pathological states associated with elevated thrombotic risk. Data are represented in corresponding reviews [3–8]. Many studies have also revealed elevated MPs concentration in both arterial and venous thrombosis. In acute coronary syndromes, the concentration of platelet MPs (PMPs) was found to be increased [9], as was the concentration of endothelial MPs (EMPs) [10–12]. Increased tissue factor-bearing MPs concentration [13,14] or activity [15,16] was associated with venous thromboembolic events in patients with cancer. At the same time, data about the MPs concentration in unprovoked venous thromboembolism (VTE) are very contradictive [5,17]. Recently, a number of prospective studies have appeared that examine the role of increased concentrations of MPs in cancer and recurrent thrombosis, but their results are also contradictory [5,17]. For other pathological states, prospective studies are few: EMPs concentration increase was an independent predictor of cardiovascular complications in patients with heart failure, type II diabetes, and end-stage renal failure [18–20].

Thus, although there is a considerable amount of data on the involvement of MPs in hypercoagulation, MPs concentration does not always reflect the risk of thrombotic complications. Therefore, the detailed study of what type of MPs and in what way influence on coagulation is of current interest. This may help to distinguish the conditions when MPs add risk of thrombosis. It is well known that coagulation can be activated by two pathways: external, when coagulation is triggered by tissue factor (TF), and internal, when factor XII is activated. This phase is called coagulation initiation. Activation of either pathway leads to the same reactions in the coagulation cascade—the clot growth phase. The process finishes with the termination phase—the protein C reactions. Phospholipid surfaces containing phosphatidylserine (PS) play an important role in these phases, especially in the propagation phase. MPs are able to increase the clot growth rate by providing such surfaces and by binding coagulation factors at higher concentrations than platelets [21–23]. MPs can also trigger coagulation activation. TF-dependent activation from monocyte MPs (MMPs), obtained by monocyte stimulation with lipopolysaccharide (LPS), and a weaker contact activation from PMPs were shown in the works of Aleman et al [24], Tripisciano et al [25] and Van der Meijden et al [26] in the thrombin generation test without the addition of activator. Contact activation from erythrocyte MPs (ErMPs) was shown in the works of van der Meijden [26] and Rubin et al. [27]. The stronger activation

from TF-bearing MMPs and EMPs compared to TF-negative PMPs, ErMPs, and neutrophil MPs was demonstrated in the recalcification test in works of Khaspekova et al [28], Shustova et al [29] and Antonova et al [30]. The importance of PS in the procoagulant effect of PMPs [25] and the amplification of TF-initiated thrombin generation by PMPs [24] and ErMPs [27] indirectly indicate their participation in coagulation propagation. However, all these works were performed with homogeneous tests that do not allow for direct separation of the activation and propagation phases.

Thrombodynamics test allows us to observe the activation and propagation phases independently. The time of appearance and number of spontaneous activation centres characterize the ability of MPs to initiate coagulation. The MPs influence on the growth rate of clot triggered by surface with immobilized TF characterizes their impact on coagulation propagation. In this work, we compared MPs derived from almost all cells that are the major sources of MPs in blood (platelets, erythrocytes, endothelial cells and monocytes) in Thrombodynamics test. The comparison revealed the predominant impact of TF-bearing MMPs and EMPs on coagulation activation and ErMPs on coagulation propagation.

## Materials and methods

Blood of healthy volunteers from the laboratories staff from Dmitry Rogachev National Medical Research Center of Pediatric Hematology, Oncology and Immunology and from National Medical Research Center for Cardiology was collected for subsequent plasma or cell isolation with the approval of the ethics committees of the Center for Theoretical Problems of Physico-chemical Pharmacology in time period from 03.2015 to 12.2019. Written informed consent was obtained from all donors.

### Preparation of microparticles of different cellular origins

Microparticles (MPs) produced by activated platelets, monocytes, human monocytic THP-1 cells and endothelial cells were prepared as described earlier in detail [29,31].

Platelets were isolated from the blood of healthy volunteers. Washed platelets suspended at a concentration of  $5 \times 10^8$  platelets/ml in Tyrode/HEPES solution (137 mM NaCl, 2.7 mM KCl, 0.36 mM  $\text{NaH}_2\text{PO}_4$ , 0.1% dextrose, 1 mM  $\text{MgCl}_2$ , 1 mM  $\text{CaCl}_2$ , 0.35% BSA, 5 mM HEPES, pH 7.35) were activated by 10  $\mu\text{M}$  thrombin receptor activating peptide (SFLLRN) for 10 min at 37°C.

Monocytes were isolated from the blood of healthy volunteers. Citrated blood was centrifuged at 180g, 10 min to obtain platelet rich plasma, platelets were removed by centrifugation (1000g, 15 min), and plasma was returned to the blood. Starch solution was added to agglutinate erythrocytes and after their precipitation, the supernatant was layered over Histopaque1077 solution and centrifuged at 400 g, 30 min. Mononuclear leukocytes were washed from the «buffy coat» formed after this centrifugation, resuspended in RPMI 1640 medium, containing 20 mM HEPES, 2 mM L-glutamine, 1 mM sodium pyruvate, penicillin (50 U/ml), streptomycin (100  $\mu\text{g}/\text{ml}$ ), and 10% fetal bovine serum, seeded into untreated 100 mm Petri dishes (25-x 106 cells/dish) and cultivated for 18 hours. Not attached mononuclear cells were washed off and adherent monocytes were activated by 1  $\mu\text{g}/\text{ml}$  bacterial lipopolysaccharide (LPS) (SigmaAldrich, USA) for 6 hours. Activation of monocytes by LPS (as well as activation of endothelial cells and THP-1 cells—see below) was performed in a medium containing not-inactivated fetal bovine serum (instead of inactivated) as a source of LPS-binding protein.

THP-1 human monocytic cell line was obtained from American Type Culture Collection (ATCC TIB-202) (Bethesda, MD, USA) and stored in cell bank of National Medical Research Center for Cardiology. After thawing, cells were cultured under standard conditions (37°C,

5% CO<sub>2</sub>) in RPMI 1640 medium containing 20 mM HEPES, 2 mM L-glutamine, 1 mM sodium pyruvate, penicillin (50 U/ml), streptomycin (100 µg/ml), and 10% heat inactivated FBS. Monocytic origin was confirmed by staining of CD45 and CD14 antigens. Cultured cells reach stable growth within 1–2 weeks and those cells were used for activation and further isolations of MPs. THP-1 cells were activated with 1 µg/ml LPS for 6 hours.

Endothelial cells were isolated from human umbilical vein as described earlier [32]. Informed consent was signed by all pregnant women whose umbilical cord after delivery was used for cell isolation. Endothelial cells were cultured under standard conditions (37°C, 5% CO<sub>2</sub>) in DMEM medium containing 20 mM HEPES, 2 mM L-glutamine, 1 mM sodium pyruvate, penicillin (50 U/ml), streptomycin (100 µg/ml), 10% heat inactivated fetal bovine serum (FBS), 200 µg/ml vascular endothelial growth factor (all purchased from Gibco Life Technologies, USA), and 5 U/ml heparin (Moscow Endocrine Plant, Russia). Endothelial origin was confirmed by typical morphology as well as by staining of CD31 and von Willebrand factor antigens. Confluent cultures of endothelial cells of the second/third passages were used for their activation and for further isolation of MPs. Endothelial cells were activated with 1 µg/ml LPS for 12 h in heparin free culture medium.

Erythrocyte-derived MPs were prepared as described by Van Der Meijden et al. [33] with some modifications [30]. Blood from healthy volunteers was collected in 3.8% sodium citrate at a blood/anticoagulant ratio of 9/1. Blood was centrifuged at 180 g for 10 min. Platelet-rich plasma and the leukocyte “buffy coat” were removed, and 1 ml of erythrocytes was collected from the lower part of the erythrocyte pellet and diluted in 9 ml of HBS buffer. Erythrocytes were counted in an Abacus Junior B haematological analyser (Diatron Ltd., Austria) and washed 3 times in HBS at 2000 g for 15 min. Erythrocytes were resuspended in HBS at a concentration of  $1 \times 10^9$ /ml, supplemented with 3 mM CaCl<sub>2</sub> and treated with 10 µM A23187 calcium ionophore (Sigma-Aldrich, Inc., St. Louis, MI, USA) for 60 min at room temperature.

Activated platelets were spun down by double centrifugation at 2500 g for 15 min. Culture medium from activated monocytes and endothelial cells and suspension of activated THP-1 cells were centrifuged at 400 g for 10 min and then at 2500 g for 15 min. Erythrocytes and their large fragments were removed by centrifugation at 2000 g for 15 min and at 2500 g. MPs were sedimented from obtained supernatants at 20,000 g for 30 min at 4°C and resuspended in filtered (filters Millex®—VV, 0.1 µm) HEPES-buffered saline (HBS, 10 mM HEPES, 140 mM NaCl, pH 7.4) containing 1% BSA (HBS/BSA). Suspensions contained in 1 ml MPs from  $5 \times 10^8$  platelets,  $1 \times 10^6$  monocytes, 1 or  $3 \times 10^6$  THP-1 cells,  $1 \times 10^6$  ECs, and  $1 \times 10^9$  erythrocytes.

All MPs were frozen in liquid nitrogen, stored at -70°C for no longer than 6 months and thawed at 37°C just before use. Repeat freezing/thawing cycles were avoided. For procoagulant activity measurement, MPs were thawed, centrifuged for 30 min at 16,000 g, resuspended in buffer A (150 mM NaCl, 2.7 mM KCl, 1 mM MgCl<sub>2</sub>, 0.4 mM NaH<sub>2</sub>PO<sub>4</sub>, 20 mM HEPES, 5 mM glucose, 0.5% bovine serum albumin, pH 7.4, filtered through a 0.22-µm membrane) and concentrated to the necessary extent.

### Counting of microparticles

MPs were thawed at 37°C, and 5 to 45 µl of suspension was added to 300 µl of annexin V binding buffer (Becton Dickinson, BD Bioscience, San Jose, CA, USA). After the addition of 2.5 µl of annexin V-FITC (Becton Dickinson, BD Bioscience, San Jose, CA, USA), the suspension was incubated in the dark for 30 min at room temperature. Control probes contained filtered HBS buffer without MPs. Standard beads with a diameter of 3 µm and known concentration (MP Count Beads, BioCytex, Stago, France) were used for counting calibration. Fifteen microliters of these beads was added to the analysed probes. Standard beads with a diameter of 1 µm

(Flow cytometry Sub-Micron Size Reference Kit, Invitrogen, Life Technologies Corp., Carlsbad, CA, USA) were used for sizing calibration. MPs were analysed and counted in a FACS Canto II flow cytometer (Becton Dickinson, BD Bioscience, San Jose, CA, USA). Events were acquired at a low rate mode (less than 3000 events per sec). Data acquisition and analysis were performed using CELL Quest™ software (Becton Dickinson, BD Biosciences, San Jose, CA, USA). The noise threshold was set up in the FITC fluorescence channel (200 arbitrary units, a.u.). In preliminary experiments, we noticed that a much lower number of MPs were counted when the noise threshold was set up in the SSC or FSC channel, which was presumably due to the elimination of a significant fraction of small MPs from the analysis. Events above fluorescence threshold were counted in the SSC/FSC (side scattering/forward scattering) window in the size gate  $< 1 \mu\text{m}$  (size calibration beads). Analysis was performed until 1000 events were acquired in the gate for 3- $\mu\text{m}$  counting beads. The concentration of MPs in probes was calculated as follows: number of MPs in  $1 \mu\text{l}$  = (number of events in the gate  $< 1 \mu\text{m}$ ) (number of counting beads in  $1 \mu\text{l}$ )  $\times$  (dilution coefficient) / 1000. The dilution coefficient was applied upon the addition of different volumes of analysed MPs (from 5 to 45  $\mu\text{l}$ ) and counting beads (15  $\mu\text{l}$ ). The number of events ( $< 1 \mu\text{m}$ ) in  $1 \mu\text{l}$  of negative control probes (HBS buffer without MPs) was subtracted from the number of MPs in  $1 \mu\text{l}$ . For all types of MPs, we observed a linear relationship between the number of counted MPs and the volume of analysed probe (5–45  $\mu\text{l}$ ).

### Preparation of phospholipid vesicles

Artificial phospholipid vesicles composed of 80% phosphatidylcholine (PC) and 20% phosphatidylserine (PS) or 15% PS and 85% PC or 10% PS and 90% PC were prepared according to the protocol recommended by Avanti Polar Lipids with minor changes. Phospholipids dissolved in chloroform were transferred into a round-bottomed flask, dried for 30 minutes under a nitrogen current to eliminate chloroform, and hydrated in 20 mM HEPES, 140 mM NaCl (pH 7.5) buffer for 30 minutes at 55°C on a shaker. The resulting solution was treated with three freeze-thaw cycles, heated to 55°C, and forced through the extruder membrane. The pore diameter was 100 nm.

### Plasma preparation

Blood from healthy donors was collected into Greiner Bio-One Vacuette or Sarstedt Monovette citrate tubes. The first tube collected after the venipuncture was discarded. Platelet-poor plasma was obtained by blood centrifugation 15 min at 1600 g and additionally centrifuged 5 min at 10,000 g. The upper 90% of the volume were collected and regarded as platelet-free plasma. MPs were removed by centrifugation for 30 min at 16,000 g. Experiments were carried out on unfrozen plasma of individual donors.

### Thrombodynamics test

The procoagulant activity of MPs was studied using the Thrombodynamics test. The assay sensitivity to pre-analytical conditions and method error when different protocols was used is described in [34]. Thrombodynamics test turned to be sensitive to presence of active factors VIIa, IXa, XIa [35,36], microparticles [21,36], unfractionated heparin and enoxaparin [37] in plasma, impaired coagulation in hemophilia [38], hypercoagulation in patients with sepsis [39], malignant tumors [40], multiple myeloma [41]. The assay was shown to be useful for monitoring heparin efficiency [37,42], predicting negative in vitro fertilization caused by hypercoagulation [43]. A total of 107  $\mu\text{l}$  of MP-poor plasma was supplemented with 13  $\mu\text{l}$  of MPs in different concentrations or buffer A. The assay was performed using a

Thrombodynamics Analyzer and Thrombodynamics kit (LLC HemaCore, Moscow, Russia): 120  $\mu$ l of plasma supplemented with MPs was transferred to an Eppendorf tube containing corn trypsin inhibitor (CTI), incubated for 3 min at 37° and then transferred to an Eppendorf tube containing Ca acetate. Recalcified plasma was placed into the chamber. An insert with immobilized TF was immersed into plasma. Clot growth began from the TF-covered surface. It was monitored by light scattering using a digital camera for 60 min. Clot images were used to determine the clot size, measured as the distance from the edge of the activator to the point where the light scattering intensity was half of the maximal light scattering of the clot at the activator. Clot growth rates were determined as the slope of the clot size dependence on time within the interval from 2 to 6 min after the beginning of clot formation (initial rate,  $V_i$ ) and 15 to 25 min (stationary rate,  $V_{st}$ ).

The appearance of clotting centres within a distant from the activator (spontaneous clots) was characterized by  $T_{sp}$ , the time when the plasma volume excluding clot growing from the activator clotted to 5% (Fig 1).

To calculate a number of spontaneous clots dependence on time, the photos were converted into binary format. Black colour corresponded to regions with a liquid state of plasma, and white colour corresponded to regions with fibrin clots. The transition occurred when the light scattering intensity at a point became higher than half of the maximal light scattering intensity of a clot growing from the activator. The time point when a spontaneous clot area exceeded an arbitrarily chosen value of 0,1 mm<sup>2</sup> was defined as the time of spontaneous clot appearance.

To characterize the growth of individual clots, we introduced the following parameters: lag-time ( $t_{lag}$ ), maximal rate of intensity increase ( $V_{Imax}$ ), and the rate of coagulation front propagation from a spontaneous clot centre ( $V_{sc}$ ). Spontaneous clots induced by low concentrations of MMPs and EMPs terminated growing early, and their light scattering intensity often did not reach half of the maximal light scattering intensity of a clot growing from activator. Therefore, we defined the lag-time as the time when the light scattering intensity in the centre of a spontaneous clot reached 2000 arbitrary units.  $V_{Imax}$  was defined as the maximum of the time derivative of light scattering intensity in a spontaneous clot centre. The size of the spontaneous clot was defined as the distance between the spontaneous clot centre and the coordinate, where the light scattering intensity from the clot was half the intensity at the centre of the clot. The clot size dependence on time was calculated until fusion of the clot with a neighbouring

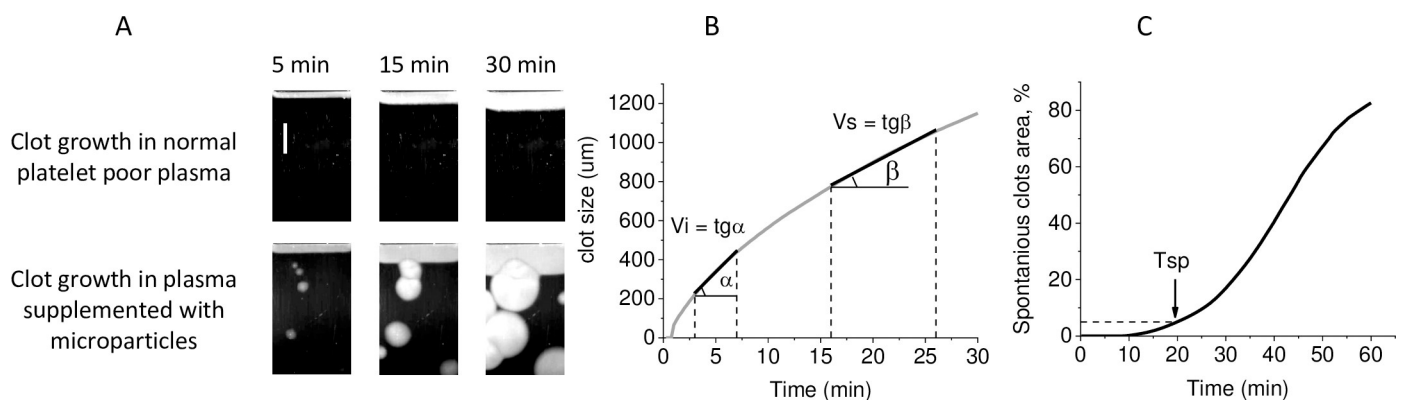

**Fig 1. Design of the Thrombodynamics assay.** A. Typical images of growing fibrin clot in normal platelet-free plasma and in plasma supplemented with microparticles. Coagulation is activated by immobilized TF (on the top), and the fibrin clot grows into the bulk of the plasma. When plasma is supplemented with microparticles, spontaneous clots in the bulk of the plasma appear. The scale bar is 2 mm. B. Clot size dependence on time, definition of initial clot growth rate,  $V_i$ , and stationary clot growth rate,  $V_s$ . C. Dependence on time of the percentage of spontaneous clot area of the whole chamber area excluding walls and clot grown from activator ( $T_{sp}$  definition).

<https://doi.org/10.1371/journal.pone.0227932.g001>

clot or until the end of the test.  $V_{sc}$  was calculated as the linear approximation of the last 10 min of clot size dependence on time.

### Preparation of fVIIai

The fVIIa inactivation method was carried out as described in [44] with modifications. FVIIa was incubated with PPACK for 60 min at 4°C at a 1:2 molar ratio. The obtained fVIIai was separated from PPACK by dialysis against Tris buffer. The final concentration of fVIIai was measured on a spectrophotometer by absorption at 280 nm. A concentration of 50 nM fVIIai completely suppressed clotting caused by 0.25 pM TF in a 2-hour experiment. Complete inactivation of fVIIa was verified with a chromogenic assay. The FVIIai sample and calibration fVIIa samples containing from 10 down to 1.25 pM, dissolved in  $Ca^{2+}$  solution were incubated for 5 min with TF, mixed with fX and incubated for 15 min. The reaction was stopped by EDTA addition, and the amount of fXa gained was evaluated by the cleavage rate of the substrate S 2765. PPACK removal was checked by the influence of fVIIai solution on fluorogenic substrate cleavage by thrombin.

### Determining the activation pathway from MPs

To determine the activation pathway from MPs, the time of spontaneous clots appearance ( $T_{sp}$ ) in plasma supplemented with MPs of different types was measured without any inhibitors, with the addition of 200 µg/ml CTI, 100 nM VIIai (TF pathway inhibitor) or both inhibitors.

### Statistical analysis

The results represented as means ± standard deviation unless otherwise described. For analysis of significant differences, the Mann-Whitney test was used with significance level  $p = 0.05$ . Spearman correlation coefficient was used to evaluate association between parameters.

## Results

### MPs characterization

MPs were characterized using flow cytometry as described in methods. The percentage of annexin V-positive MPs (above the threshold of the negative control) significantly varied in MPs of different cellular origins (for examples, see Fig 2). The smallest percentage was detected for MPs from erythrocytes (lower than 10%), intermediate percentages for MPs from platelets (15–20%), higher percentages for MPs from monocytes and THP-1 cells (approximately 30%), and the highest percentage for MPs from endothelial cells (up to 40%). Because of these variations, we counted not only annexin V-positive but all MPs and used these counts in comparative studies of their coagulation activity.

### MPs of different origins in coagulation activation

The ability of MPs to activate coagulation can be observed in the Thrombodynamics test by the appearance of clotting centres at a distance from the activating surface. These clots are called spontaneous because their appearance is caused by material in the plasma and not by activation with substances added in the test.

MPs of different origins were titrated in MP-depleted plasma in the Thrombodynamics test. MPs concentrations varied from 0 to the value at which clotting centres in the plasma volume appeared within 60 min. Since the minimal concentrations leading to the appearance of spontaneous clots for MPs of different origins differ up to a hundred times, the typical patterns

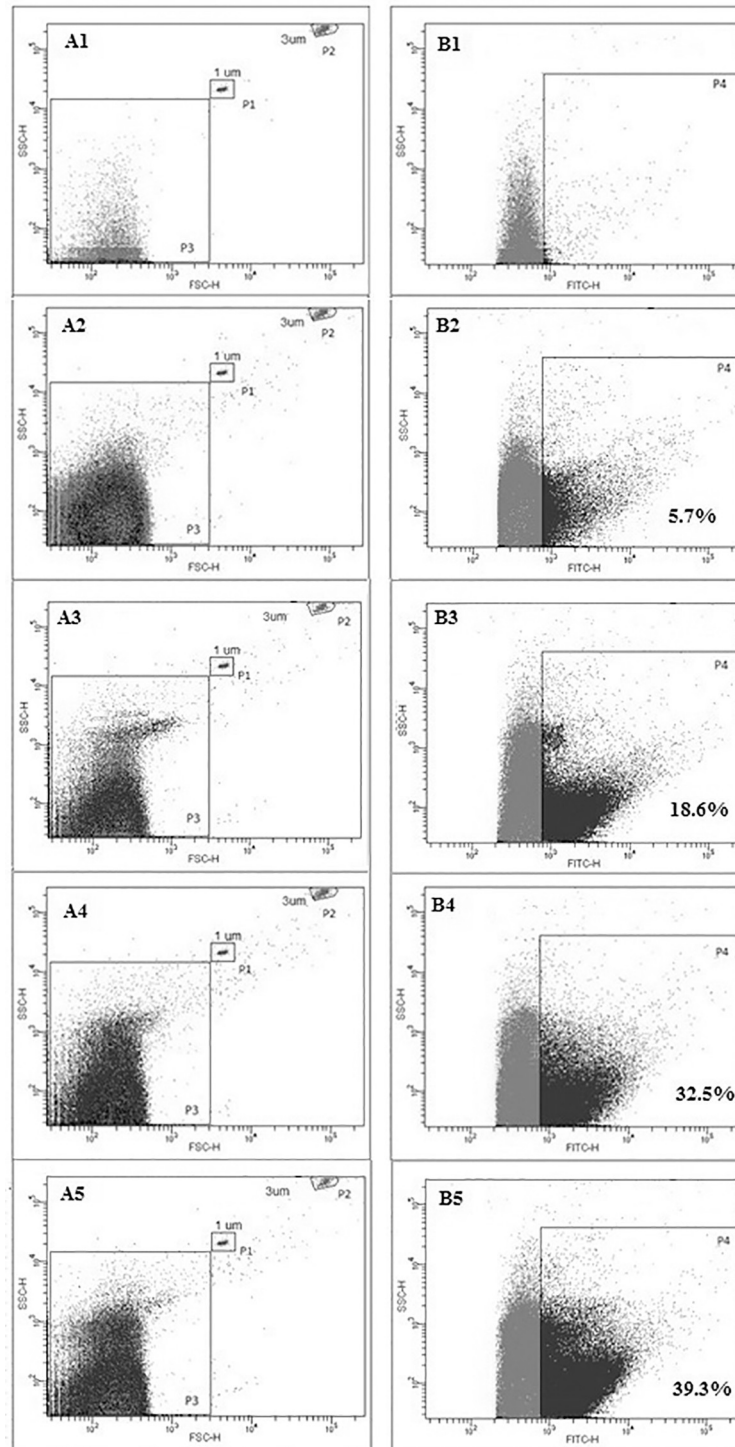

**Fig 2. Analysis and counting of MPs of different cellular origins by flow cytometry on a FACS Canto II.** The noise threshold was set up in the FITC fluorescence channel (200 a.u) (B1–B5). A1, B1 –filtered HBS buffer without MPs (negative control); A2, B2 –MPs from erythrocytes; A3, B3 –MPs from platelets; A4, B4 –MPs from THP-1 cells; A5, B5 –MPs from ECs. Annexin V-FITC was added to all probes. All events above the FITC fluorescence threshold (200 a.u) were counted in the SSC/FSC window (A1–A5) in the size gate < 1  $\mu\text{m}$  (gate P3). After subtracting the events in the negative control, all events in this gate were considered MPs. Gate P1 (A1–A5)–size calibration beads (1  $\mu\text{m}$ ), gate P2 (A1–A5)–counting beads (3  $\mu\text{m}$ ). Gate P4 (B1–B5) annexin V-positive events above the threshold set up in the negative



control in the FITC fluorescence channel. Percentages of annexin V-positive events are presented for each type of MPs. Analysis of MPs from monocytes is not shown since they have approximately the same distribution pattern as MPs from monocytic THP-1 cells (approximately 30% of annexin V-positive events).

<https://doi.org/10.1371/journal.pone.0227932.g002>

of spontaneous clots formation are presented in individual concentrations for each type of MPs (Fig 3, S1 Movie). Spontaneous clotting induced by MPs of different origins turned out to have both quantitative and qualitative differences.

The minimal MPs concentrations causing spontaneous clotting could serve as the measure of MPs activity in coagulation activation. The data for MPs of different origins are represented in Table 1. The activity of MMPs from cells of normal donors was the highest. The activity of MPs from monocyte culture THP cells was 4-fold lower. EMPs had activity 25-fold less than that of MMPs. PMPs and ErMPs were 100-fold less. Although the deviation between the activity of MPs samples obtained from cells of different donors reached from 48% for PMPs to 98% for ErMPs, all the differences between MPs activity were significant ( $p < 0.05$ ), except for the difference between PMPs and ErMPs.

Even more evident than the minimal MPs concentration causing spontaneous clots, the difference in the MPs activity was observed in the ratio of the number of coagulation centres formed within 1 hour to the total number of MPs in the chamber. Kinetics of coagulation centres appearance and its description can be found in S1 Fig, S1 Text. The number of spontaneous clots formed within an hour depended on MPs concentrations (S2 Fig). However, the differences in the number of spontaneous clots to concentration ratio between MPs of different origins were so great that even the range from the 25th to the 75th percentile from the complete range of this parameter change at different concentrations of MMPs, EMPs and PMPs did not intersect (Table 2). For the most active MMPs, less than 0.7 per thousand MMPs caused a visible centre within 1 hour. Less than  $1/10^5$  EMPs and  $1/10^6$  PMPs or ErMPs induced a separate clot.

One of the reasons for the activity difference could be TF on the MPs surfaces. We determined the activation pathway from MPs by the changes in the time of spontaneous clots appearance  $T_{sp}$  in recalcified plasma containing MPs of different origins when inhibitors of contact activation (CTI) or the TF pathway were added. The test showed that the most active MMPs, THP MPs and EMPs bear TF on their surfaces (Fig 4). In addition to TF, contact activation made a significant contribution to EMPs activity. Less active ErMPs and PMPs activate coagulation through the contact pathway only (Fig 4).

As described above, the distribution of fibrin clots in space in this method is reflected by the light scattering intensity profile. Analysis of the time dependences of light scattering intensity profiles allows the introduction of quantitative characteristics of spontaneous clots. The corresponding dependences when MPs of different origins were supplemented to plasma are represented in Fig 5. PMPs and ErMPs induced clotting in separate centres only. The light scattering intensity in the centres of clots increased along with fibrin polymerization. The area with high light scattering intensity grew as the clot propagated in space (Fig 5A and 5D). The rate of light scattering increase in the clot centre was characterized by the maximal rate  $VI_{max}$  and the coagulation front propagation from centres of spontaneous clots with the rate  $V_{sc}$ .  $VI_{max}$  and  $V_{sc}$  were calculated as described in the materials and methods. If all the fibrinogen cleaved to fibrin within the test time, the light scattering intensity in the clot centre reached a plateau and only further propagation in space continued. The maximal light scattering intensity in a clot centre reached by 60 min was indicated as  $I_{max}$ . With increasing MMPs, THP MPs and EMPs concentrations, qualitative changes in the parameters of spontaneous clots growth were observed. Therefore, the time dependences of the light scattering intensity

|                    | 5 min                                                                               | 15 min                                                                              | 30 min                                                                               | 45 min                                                                                | 60 min                                                                                |
|--------------------|-------------------------------------------------------------------------------------|-------------------------------------------------------------------------------------|--------------------------------------------------------------------------------------|---------------------------------------------------------------------------------------|---------------------------------------------------------------------------------------|
| MP depleted plasma |    |    |    |    |    |
| PMPs               |    |    |    |    |    |
| ErMPs              |   |   |   |   |   |
| EMPs               |  |  |  |  |  |
| MMPs               |  |  |  |  |  |
| THP MPs            |  |  |  |  |  |

**Fig 3. Photos of growing clot and typical patterns of spontaneous clotting induced by MPs of different origins.** As MPs of different origins induce spontaneous clotting at 100-fold different concentrations, the photos represented at arbitrary concentrations at which the patterns of clotting centre appearance were well distinguished within 60 min. The MPs concentrations in assays in photos were as follows: PMPs,  $627 \cdot 10^3$  1/ $\mu$ l; ErMPs,  $500 \cdot 10^3$  1/ $\mu$ l; EMPs,  $480 \cdot 10^3$  1/ $\mu$ l; THP MPs,  $132 \cdot 10^3$  1/ $\mu$ l; and MMPs,  $132 \cdot 10^3$  1/ $\mu$ l.

<https://doi.org/10.1371/journal.pone.0227932.g003>

profiles of spontaneous clots induced by MMPs, THP MPs and EMPs are given for two concentrations, conditionally “low” and “high”. In plasma containing MMPs, THP MPs and EMPs in “high” concentrations, coagulation began in the whole volume at some point in time. That was expressed as the background increase in light scattering intensity (Fig 5C and 5F). At conditionally “low” MMPs concentrations, distinct clotting centres appeared, the growth of which rapidly stopped (Fig 5E). EMPs were especially heterogeneous: in the same sample at conditionally “low” concentration, coagulation propagated from some centres and practically stopped from others (Fig 5B).

VI max is by some approximation proportional to the rate of fibrin formation and consequently to the thrombin concentration (at the time interval until complete polymerization). Therefore, VI max indirectly indicates activation strength. VI max in the centres of spontaneous clots induced by any type of MPs was considerably less than VI max at the surface with immobilized TF (activator) (S4 Fig). At the same time, I<sub>max</sub> in the centre of spontaneous clots could exceed I<sub>max</sub> at activator by 1.4–1.7-fold (S4 and S5 Figs). The increase in maximal light scattering intensity of a clot as a result of a diameter increase of fibrin fibrils when the thrombin concentration is decreased was theoretically predicted and experimentally shown in the article of Weisel and Nagaswami [45]. The VI max deviation in one test consisted of 33% for PMPs, 37% for ErMPs, 41% for EMPs, 50% for MMPs and 65% for THP MPs. This reveals the high heterogeneity of MPs within one sample. The VI max changes with concentration were less than the deviation within a test for all types of MPs except for EMPs (S6 Fig), which gives justification for a rough approximation to compare the average VI max for all clots formed at different concentrations. The comparison is shown in Fig 6A. The mean VI max of ErMPs and THP MPs is significantly higher than the mean VI max of the other types of MPs, and for MMPs, it is significantly lower. PMPs and EMPs did not differ significantly in this parameter. The VI max in the centre of spontaneous clots induced by any type of MPs was not higher than the 0.1–0.16 VI max at activator (Fig 6B). Consequently, the thrombin concentration in the centres of spontaneous clots was 6–10-fold lower than that at activator.

If the increment in light scattering intensity in the centre of a clot depends on thrombin formed in the immediate vicinity of the activator, the clot propagation depends on thrombin

**Table 1. The minimal MPs concentrations inducing the appearance of clotting centres.**

|         | MP concentration inducing the appearance of clotting centres, $10^3/\mu$ l mean $\pm$ sd | N |
|---------|------------------------------------------------------------------------------------------|---|
| PMPs    | 510 $\pm$ 250 <sup>*,*,*,#,\$</sup>                                                      | 7 |
| ErMPs   | 790 $\pm$ 780 <sup>*,*,*,#,\$</sup>                                                      | 7 |
| EMPs    | 180 $\pm$ 40 <sup>*,*,*,#,\$</sup>                                                       | 5 |
| MMPs    | 7,3 $\pm$ 4,8 <sup>*,*,*,*,*,#</sup>                                                     | 5 |
| THP MPs | 30 $\pm$ 18 <sup>*,*,*,*,*,#,\$</sup>                                                    | 6 |

For analysis of significant differences, the Mann-Whitney test was used.

\* p<0.05 –significant difference with PMPs

\*\* p<0.05 –significant difference with ErMPs

\*\*\* p<0.05 –significant difference with EMPs

# p<0.05 –significant difference with THP MPs

\$ p<0.05 –significant difference with MMPs. N—the number of MPs samples tested.

<https://doi.org/10.1371/journal.pone.0227932.t001>

**Table 2. The ratio of spontaneous clots number to the number of MPs in the chamber volume.** The number of MPs in the chamber volume was estimated based on MPs concentrations and considering the plasma volume where spontaneous clots were counted to be equal to 70  $\mu$ l. N—the number of tests included in the calculation. The ranges of values in the table are from the 25th to 75th percentile.

|       | N of clots at 60 min / N of MP, 1/10 <sup>6</sup> | N  |
|-------|---------------------------------------------------|----|
| PMPs  | 0.07–0.44                                         | 13 |
| ErMPs | 0.05–0.16                                         | 9  |
| EMPs  | 1.4–4.5                                           | 22 |
| MMPs  | 100–354                                           | 12 |

<https://doi.org/10.1371/journal.pone.0227932.t002>

formed at a distance from the activator as a result of positive feedbacks work. In this way, the parameters VI max and Vsc are largely determined by different reactions. The first characterizes the activation phase, and the second characterizes the propagation phase. The spontaneous clots size in most cases depended linearly on time (S7 Fig). In some cases, the linear region is preceded by a smooth acceleration from zero rate. When the light scattering intensity background is rising, the growth rate was accelerating (S7 Fig), although the consideration of the corresponding region as the growth of a separate clot was not quite correct.

Growth rates were, on average, increased with concentrations (S8 Fig) and it would be preferable to compare the growth rates for MPs of different origins at equal concentrations. However, the growth rates of clots induced by TF-bearing MPs cannot be calculated at the concentrations that PMPs and ErMPs begin to initiate clotting, and at concentrations that allow calculating the rates of clots induced by TF-bearing MPs, PMPs and ErMPs do not initiate coagulation. Thus, we represent here a comparison of the parameters of clots induced by

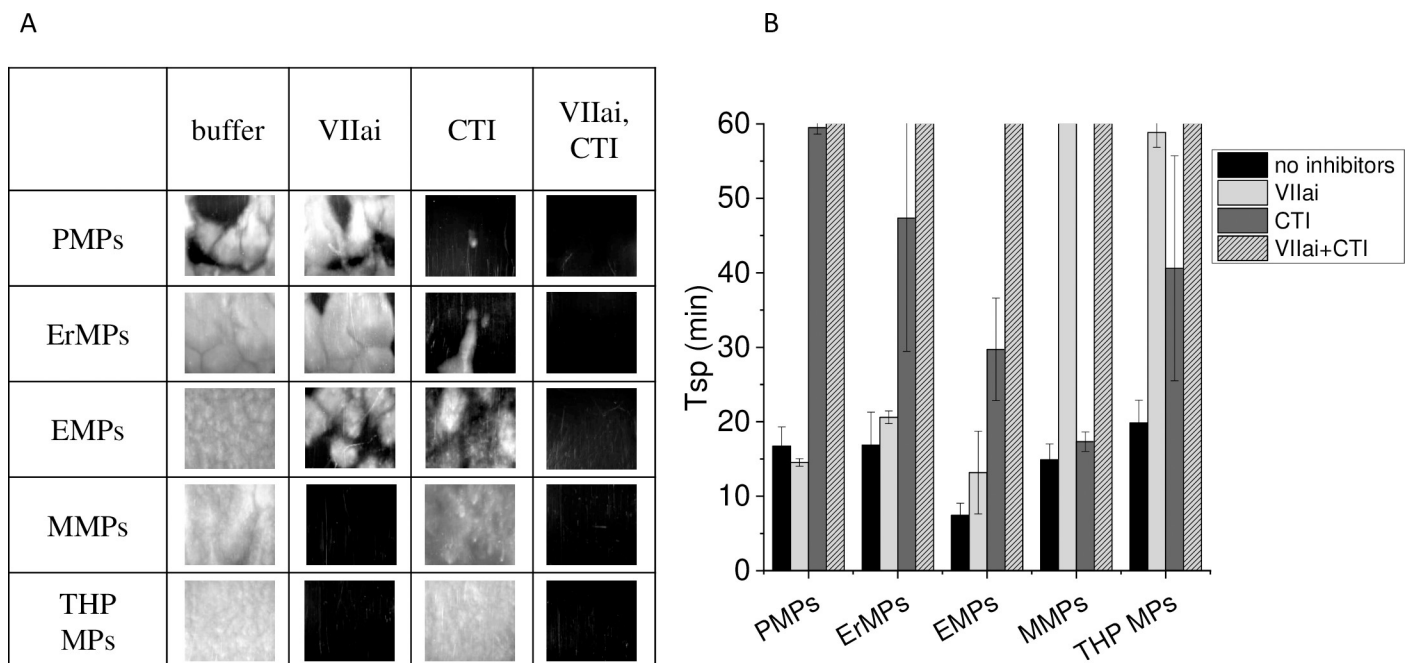

**Fig 4. Activation pathway from MPs.** Photos at 60 min of plasma supplemented with MPs of different origins in the Thrombodynamics test without any inhibitors, with 100 nM VIIai (TF pathway inhibitor), with 200  $\mu$ g/ml CTI (contact pathway inhibitor) or both inhibitors. MPs were supplemented at arbitrary concentrations, which induced the appearance of clotting centres within 10–20 min in samples without inhibitors. That was optimal for checking inhibitor effects. B. Mean  $\pm$  sd of Tsp in plasma supplemented with MPs without inhibitors and with one or both inhibitors. Three repeats were carried out for PMPs and THP MPs and two repeats for ErMPs, EMPs and MMPs. PMPs—platelet microparticles, ErMPs—erythrocyte microparticles, EMPs—endothelial microparticles, MMPs—monocyte microparticles, THP MPs—microparticles from monocyte culture.

<https://doi.org/10.1371/journal.pone.0227932.g004>

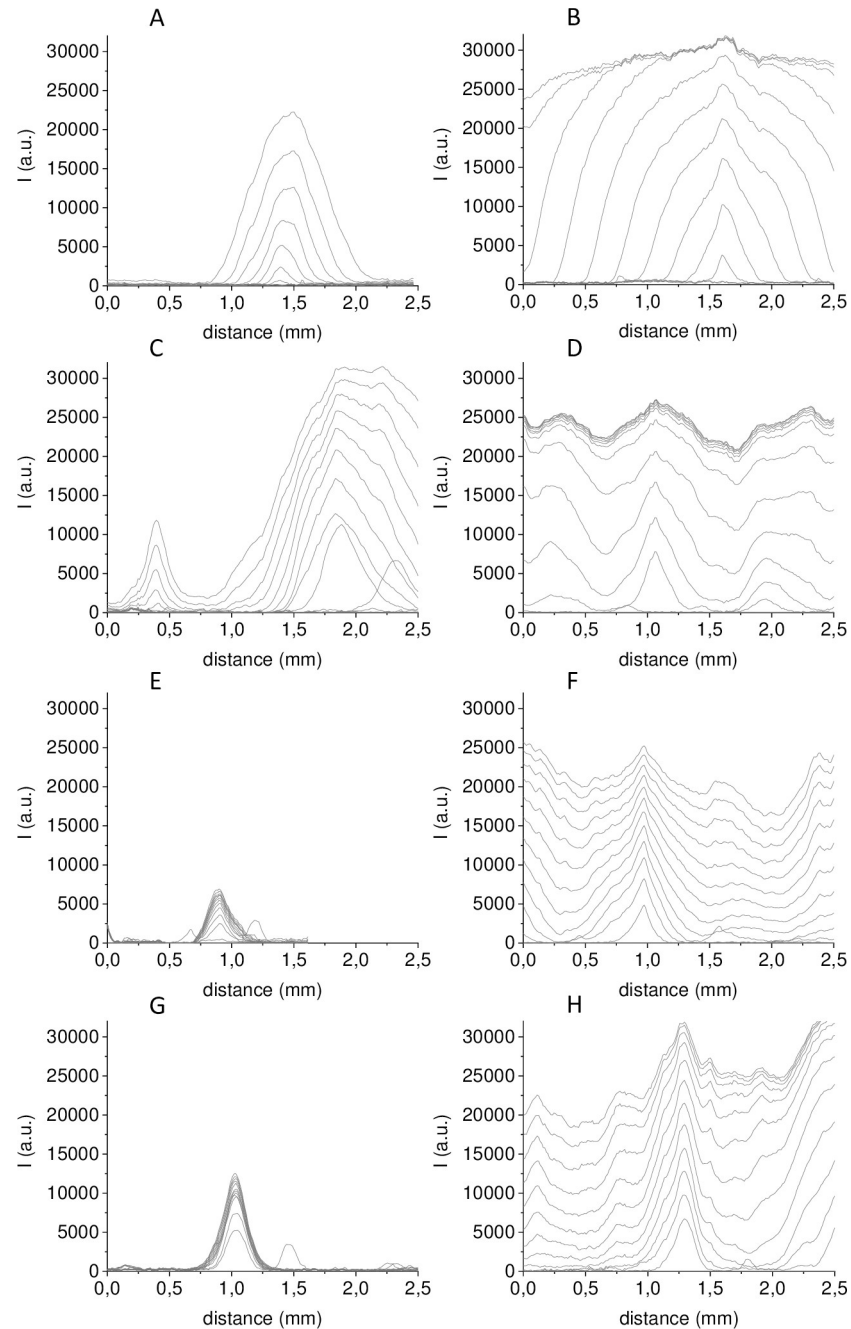

**Fig 5. The light scattering intensity profiles of spontaneous clots induced by MPs of different origins.** Clotting was induced in normal MP-depleted plasma by supplementation of (A) platelet MPs, (B) erythrocyte MPs, (C), (E), (G) endothelial MPs, monocyte MPs, THP MPs respectively in conditionally “low” concentrations, (D), (F), (H) endothelial MPs, monocyte MPs, THP MPs respectively in conditionally “high” concentrations. The time interval between profiles is 5 min.

<https://doi.org/10.1371/journal.pone.0227932.g005>

MPs of different origins rather than the MPs themselves. In the concentration ranges where clots growth rates could be calculated, changes in the mean rates with the concentrations were less than deviations within one test (the same as for VI max); therefore, we considered the average for different concentrations data (Fig 7A). The mean  $V_{sc}$  of clots induced by PMPs

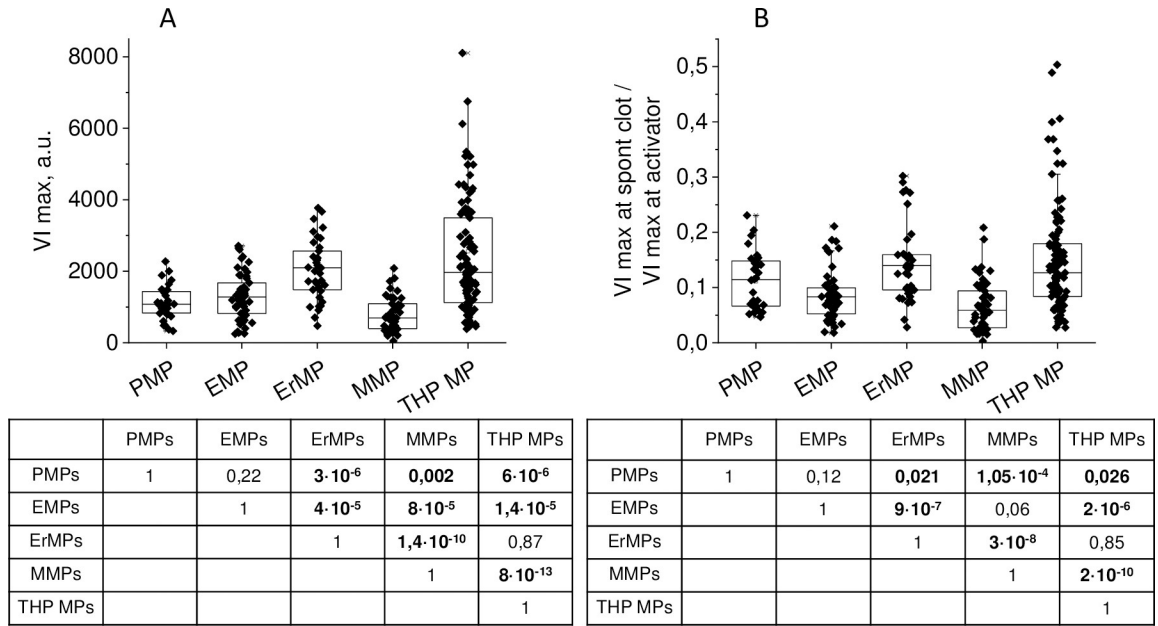

**Fig 6. The maximal rate of increase of light scattering intensity in the centre of spontaneous clots and its ratio to the maximal rate of increase of light scattering intensity of clots growing from activator.** (A) The mean maximal rate of light scattering intensity increase in the centre of spontaneous clots growth. (B) Ratio of the mean maximal rates of light scattering intensity increase in the centre of spontaneous clots growth to the maximal rate of light scattering intensity increase of clots growing from activator. Dots correspond to individual clots induced by different MP samples at different concentrations. Boxes on the plot bound the 25th and the 75th percentiles. Tables under histograms contain significance levels of corresponding parameter differences between MP of different origin according to Mann–Whitney test.

<https://doi.org/10.1371/journal.pone.0227932.g006>

and EMPs did not differ significantly. The mean  $V_{sc}$  of clots induced by MMPs and THP MPs was significantly less than that induced by other MPs, and for ErMPs, it was significantly higher than that induced by others. Different phospholipid concentrations due to large differences in MPs concentrations could be one of the reasons for MMPs and ErMPs standing out.

It was previously shown that in the presence of a sufficient amount of phospholipid surface in the plasma and activation higher than the threshold, the steady-state clot growth rate over a wide range does not depend on the TF concentration [46], type of TF-bearing cells [47] or the method of activation [38]. One could expect that the growth rates of spontaneous clots and the clot from the activator will be close. However,  $V_{sc}$  deviation within one test consisted on average of 4  $\mu\text{m}/\text{min}$  (33%), 8  $\mu\text{m}/\text{min}$  (22%), 7  $\mu\text{m}/\text{min}$  (76%), 2.5  $\mu\text{m}/\text{min}$  (84%), and 3.2 (97%) for PMPs, ErMPs, EMPs, MMPs, and THP MPs respectively. Only spontaneous clots induced by ErMPs grew at approximately the same rate as the clot from the activator. The medians of the  $V_{sc}$  to  $V_s$  ratio were 0.5, 0.93, 0.22, 0.09, and 0,05 for PMPs, ErMPs, EMPs, MMPs, and THP MPs respectively (Fig 7B). The Spearman correlation coefficients between the growth rates of spontaneous clots and clot from activator were 0.36 ( $p = 0.024$ ) for PMPs, 0.74 ( $p = 3 \cdot 10^{-15}$ ) for ErMPs, 0.78 ( $p = 5 \cdot 10^{-23}$ ) for EMPs, 0.61 ( $p = 3 \cdot 10^{-10}$ ) for MMPs, and 0.62 for THP MPs.

One could assume that any MPs except for ErMPs induce clotting at concentrations that did not supply enough phospholipids to plasma to support coagulation propagation efficiently. ErMPs induce spontaneous clotting at the highest concentration and consequently the highest phospholipid concentration. In the case of lipid deficiency, a dependence of the rate on the activation force of a particular centre can be expected. We did not have the opportunity to measure activation from each centre directly, but indirect data were provided by the rate of

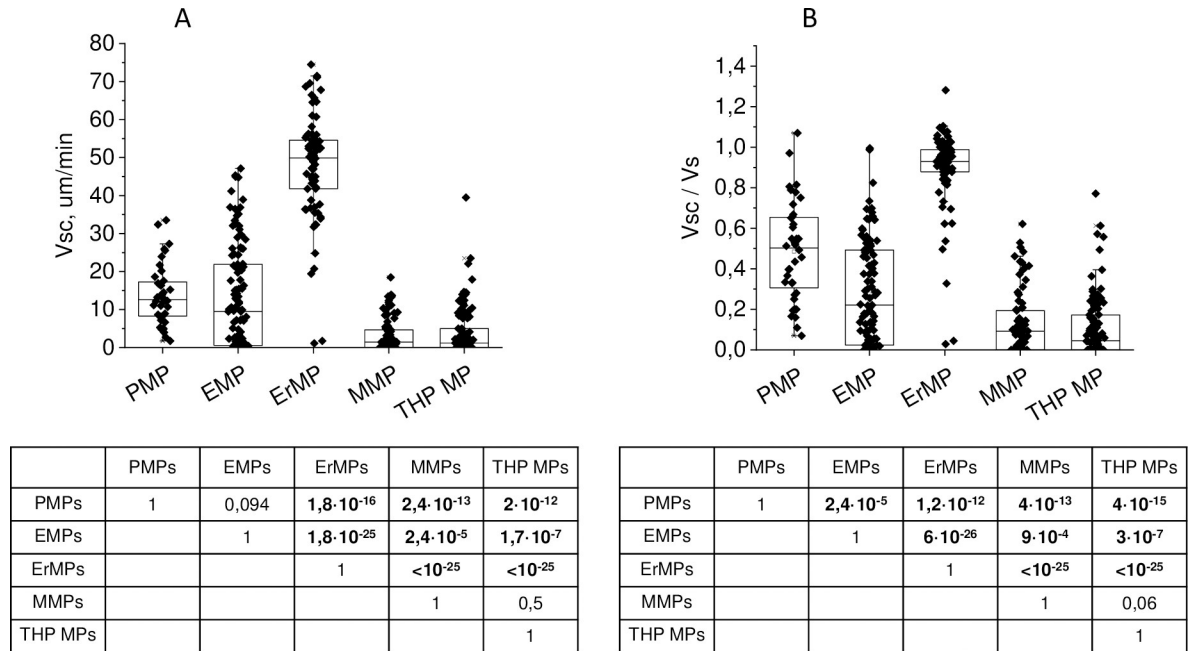

**Fig 7. The rate of coagulation front propagation from centres of spontaneous clots induced by MPs of different origin and its ratio to the clot growth rate from activator.** (A) Mean rate of coagulation front propagation from centres of spontaneous clots. (B) Mean ratio of the rate of coagulation front propagation from the centres of spontaneous clots to the clot growth rate from the activator. Dots correspond to individual clots induced by different MP samples at different concentrations. Boxes on the plot bound the 25th and the 75th percentiles. Tables under histograms contain the significance levels of corresponding parameter differences between MP of different origins according to the Mann–Whitney test.

<https://doi.org/10.1371/journal.pone.0227932.g007>

increase in light scattering intensity and the lag-time of spontaneous clots appearance. For ErMPs, there was no correlation between VI max and Vsc:  $r = 0.19$ ,  $p = 0.22$ . For MPs of other types, the correlation of these parameters was significant but weak: 0.43 ( $p = 0.026$ ) for PMPs, 0.58 ( $p = 8 \cdot 10^{-9}$ ) for EMPs, 0.32 ( $p = 0.004$ ) for MMPs, and 0.41 ( $p = 1 \cdot 10^{-5}$ ) for THP MPs (S9 Fig). The t lag did not show a strong correlation with Vsc also: -0.45 ( $p = 0.03$ ) for PMPs, -0.64 ( $p = 1.2 \cdot 10^{-4}$ ) for ErMPs, -0.35 ( $p = 0.025$ ) for EMPs, -0.5 ( $p = 0.0015$ ) for MMPs, and 0.01 ( $p = 0.92$ ) for THP MPs (S10 Fig). Thus, the deviations in Vsc within one test were determined at least not only by the activation strength.

### MPs of different origins in coagulation propagation

The influence of MPs on coagulation propagation was evaluated by changes in the initial (Vi) and stationary (Vs) growth rates of clot growing from the activator in the Thrombodynamics test at different MPs concentrations (Fig 8). Clot growth rates were calculated for MPs concentrations from 0 to those at which spontaneous clots were formed within 30 min, which prevented the correct calculation of the rates. Vi dependences on the concentrations of MPs of different origins tended to saturate with increasing concentration (Fig 8A and 8C). Vs dependences had the same tendency, but the influence of MPs was weaker and the saturation was less pronounced (Fig 8B and 8D). MMPs bearing the highest TF concentrations caused active spontaneous clotting at concentrations of  $4\text{--}16 \cdot 10^3/\mu\text{l}$ , which did not allow the measurement of clot growth rate dependences on concentration in the same range as for other MPs types. At a concentration of  $3 \cdot 10^3/\mu\text{l}$ , MMPs increased Vi by  $5 \pm 6 \mu\text{m}/\text{min}$  and Vs by  $2.4 \pm 2.2 \mu\text{m}/\text{min}$ . For THP MPs and EMPs bearing lower TF concentrations, the rate dependences on concentration could be measured to  $50 \cdot 10^3/\mu\text{l}$  and  $200 \cdot 10^3/\mu\text{l}$ , respectively. Significant differences in

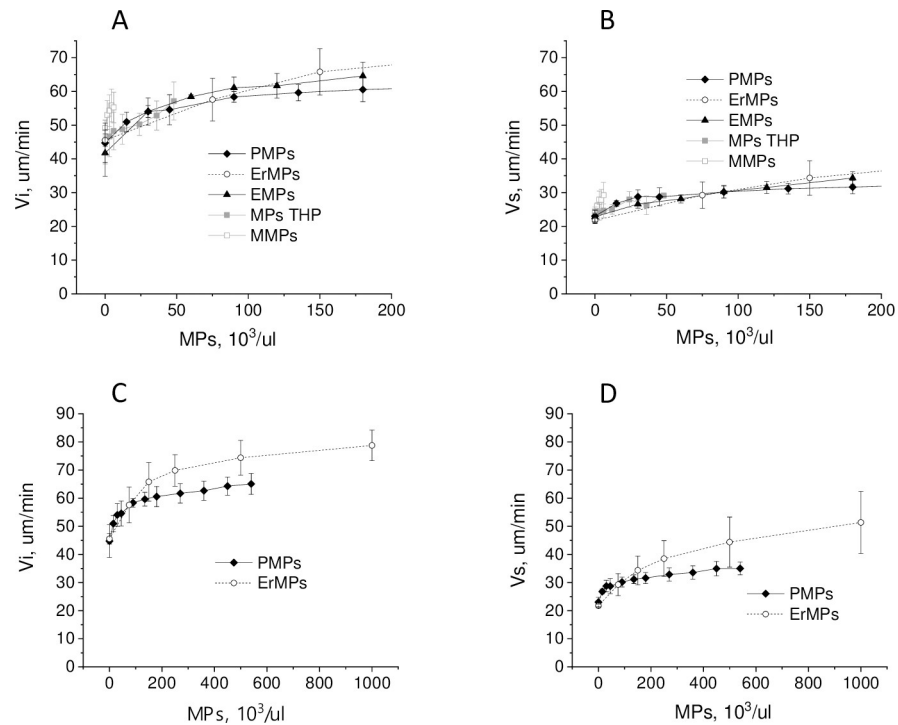

**Fig 8. Influence of MPs of different origin on coagulation propagation.** Mean  $\pm$  sd dependence of the initial (A) and stationary (B) clot growth rates on platelet (PMPs) ( $n = 10$ ), erythrocyte (ErMPs) ( $n = 7$ ), endothelial (EMPs) ( $n = 5$ ), THP monocyte culture (THP MPs) ( $n = 6$ ) and monocyte (MMPs) ( $n = 5$ ) microparticles concentrations. (C), (D) The same dependences on a smaller scale.

<https://doi.org/10.1371/journal.pone.0227932.g008>

the rate dependences on the MPs concentrations of different origins were not observed in this range (Fig 8A and 8B). However, the  $V_i$  and  $V_s$  dependence on the ErMPs concentration tended to be smoother than the dependence on the MPs of other types at these concentrations. The measurement of rate dependences at higher concentrations was possible for PMPs and ErMPs only. The saturation levels of  $V_i$  were considerably different for these MPs types. The difference in  $V_s$  at high PMPs and ErMPs concentrations was even more pronounced (Fig 8A and 8C).

It is possible that the difference between ErMPs and PMPs is explained by the different contents of phosphatidylserine (PS) because platelet membranes contain, according to various sources, from 6.7 to 12% PS [48–51], while erythrocyte membranes range from 13 to 16% [48,49,52]. To examine the effect of the PS content, we measured the dependence of clot growth rates on the concentration of artificial vesicles with a diameter of 100 nm, consisting of phosphatidylcholine (PC) and PS. The PS contents were 10%, 15%, and 20%. Based on the area occupied by one phospholipid molecule and the surface area of the vesicle, a concentration of 1  $\mu\text{M}$  phospholipids corresponds to approximately  $1.4 \cdot 10^7/\mu\text{l}$  of vesicles, which is approximately 20 times higher than the concentration of ErMPs causing spontaneous coagulation. Artificial vesicles did not induce spontaneous clotting at any of the tested concentrations. Both  $V_i$  and  $V_s$  reached saturation for artificial vesicles. The PS content increment from 10% to 20% led to a sharp increase in the slope of the initial linear part of the  $V_s$  dependence on the vesicle concentration from  $0.24 \mu\text{m}/(\text{min} \cdot \mu\text{M})$  to  $5.1 \mu\text{m}/(\text{min} \cdot \mu\text{M})$ . Moreover, with an increase in PS content, the concentration at which the rates reached saturation decreased, but the saturation level did not change (Fig 9). The maximal increase in  $V_s$  due to artificial vesicles



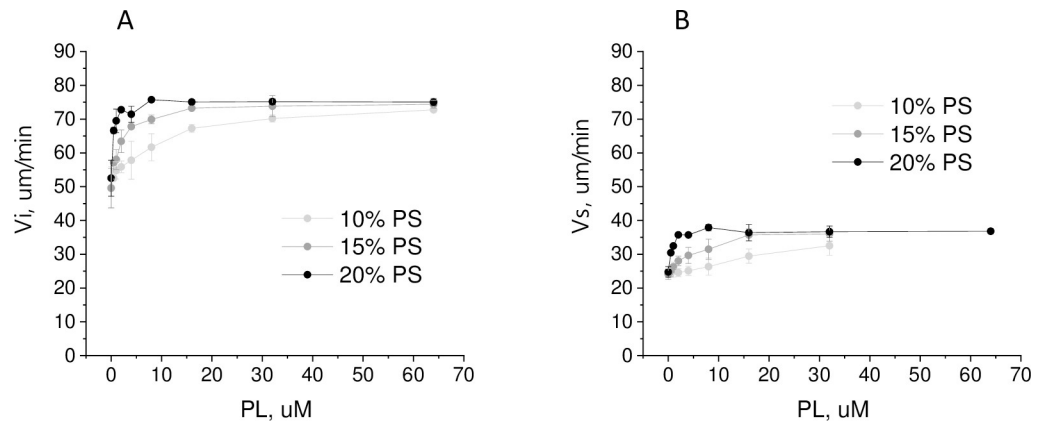

**Fig 9. Influence of artificial vesicles on coagulation propagation.** Mean  $\pm$  sd dependence of the initial (A) and stationary (B) clot growth rates on the concentration of artificial phospholipid vesicles (PL) containing 10% ( $n = 3$ ), 15% ( $n = 3$ ) and 20% ( $n = 2$ ) PS.

<https://doi.org/10.1371/journal.pone.0227932.g009>

was  $13 \pm 3 \mu\text{m}/\text{min}$ . PMPs and ErMPs demonstrated a large deviation between donors. PMPs increased  $V_s$  by  $11 \pm 4 \mu\text{m}/\text{min}$  on average and ErMPs by  $23 \pm 8 \mu\text{m}/\text{min}$  at a concentration of  $500 \cdot 10^3/\mu\text{l}$ . At a concentration of  $1000 \cdot 10^3/\mu\text{l}$ , ErMPs increased  $V_s$  by  $30 \pm 10 \mu\text{m}/\text{min}$ , and no saturation was observed. Therefore, both the type of dependence and the maximal effect indicate that the influence of ErMPs on  $V_s$  was not explained solely by the content of PS.

## Discussion

It was previously shown that MPs in the plasma of patients cause the formation of spontaneous clots [36]. In the vast majority of cases, the clot growth rate from the activator in these samples was also increased. In this work, we investigated MPs of which origin has the strongest effect on the formation of spontaneous clots and the clot growth rate from the activator and, therefore, on coagulation activation and propagation. For this purpose, we tested MPs obtained in vitro from the main possible sources of MPs in blood in the Thrombodynamics test.

Our method of MPs counting with flow cytometry had some differences with the standard one: instead of counting annexin-positive MPs only, we took into account all the objects less than  $1 \mu\text{m}$  and higher than the fluorescence threshold (the number of objects in stained buffer was subtracted). This was done because the percentage of annexin V-positive MPs (above the threshold of the negative control) significantly varied in MPs of different cellular origins: lower than 10%, 15–20%, approximately 30%, and up to 40% for ErMPs, PMPs, MMPs and THP MPs, and EMPs, respectively. Variations in the percentage of annexin V-positive MPs could be at least partially explained by the difference in MPs size. Earlier, using the dynamic light scattering method, for the MPs sizing, we have shown in direct comparative studies that ErMPs have an average diameter of 200–250 nm, PMPs 350–400 nm, EMPs and THP MPs 400–500 nm, and EMPs 550–600 nm [29,30,53]. We presumed that annexin V-FITC binding to small MPs was too low to provide FITC signals above the threshold noise level, which is why we measured the different percentages of annexin V-positive events in samples of MPs of different origins with different average sizes.

It is difficult to evaluate the physiological range of MPs concentrations by comparing the absolute values of concentrations with literature data, since even when measuring concentrations using flow cytometry, depending on the measurement protocol and the cytometer used, normal MPs concentrations may vary from hundreds to  $10^6/\mu\text{l}$  [2,54–57]. Therefore, the physiological range of concentrations could be estimated only in relation to the normal MPs

concentration measured in the same study. Our method of MPs counting is not applicable for measuring MPs concentrations in plasma. As a result, we can only assess the physiological range of concentrations indirectly. According to our data, the concentration of PS + MPs in the plasma is  $53 \cdot 10^3/\mu\text{l}$ . The same concentration of PS + MPs is contained in approximately  $300 \cdot 10^3/\mu\text{l}$  PMPs,  $530 \cdot 10^3/\mu\text{l}$  ErMPs,  $180 \cdot 10^3/\mu\text{l}$  MMPs and  $130 \cdot 10^3/\mu\text{l}$  EMPs. Since ErMPs, EMPs, and MMPs normally make up less than 20% of the total MPs concentration [2], a concentration of  $500 \cdot 10^3/\mu\text{l}$  for ErMPs and  $200 \cdot 10^3/\mu\text{l}$  for EMPs and MMPs can serve as a rough estimate of the upper physiologically achievable concentrations.

The MPs activity in coagulation activation, estimated from the minimal concentration causing spontaneous clotting, was determined primarily by TF on the surface of the MPs, which corresponds to the results from comparing the same MPs in the recalcification test in our previous works [29–31] and in the thrombin generation test in [24–26]. Based on the fact that MMPs, such as THP MPs, have ~ 30% PS+MMPs, the ratio of PS+MMPs leading to spontaneous clotting to the normal concentration of PS + MPs in plasma will be approximately 4%. Such a concentration seems quite achievable in vivo, especially locally, for example, for inflammatory vascular diseases, monocytes and endothelium activation.

The ratio of the number of coagulation centres to the number of MPs in a chamber is on the order of one clot per  $10^3$ – $10^7$  MPs. This led to the assumption that coagulation centres may be caused not by MPs themselves but by some larger residual fragments of cells or MPs aggregates. In addition to the fact that the ratio of the number of clots to the number of MPs is greater for TF-bearing MMPs and EMPs, coagulation begins over the whole volume of the chamber, not just from the individual centres, when certain concentrations of MMPs and EMPs are reached. This is probably due to the participation of a much larger fraction of TF +MPs than  $1/10^3$  in coagulation activation due to the effect described by Kastrup et al., when the convergence of several centres with individual subthreshold activation leads to overcoming the activation threshold [58].

In the range up to  $200 \cdot 10^3/\mu\text{l}$ , there were no significant differences in the effect of PMPs, ErMPs, and EMPs on the clot growth rate. Perhaps we could not identify it due to deviations between the MPs samples isolated from the cells of different donors and between the donor plasmas in which the titrations were performed. However, in view of the fact that the differences in the effects of MPs on the rates were weak and the protein composition in MPs originating from different cells is also different, the effect of MPs on rates is probably determined by the lipid composition of membranes to a larger extent than by the protein composition. Rather inactive at low concentrations, ErMPs at  $500 \cdot 10^3/\mu\text{l}$  increased the clot growth rate to a significantly higher level in comparison with  $500 \cdot 10^3/\mu\text{l}$  PMPs. The growth rate of spontaneous clots induced by ErMPs also significantly exceeds the growth rate of clots induced by PMPs, EMPs and MMPs. The high ErMPs activity in coagulation propagation is consistent with the data of van der Meijden, where the same conditional PS activity, which was measured by the prothrombinase activity on MPs samples, corresponded to a 3-fold higher activity of PMPs compared with that of ErMPs [26]. ErMPs activity is not explained by PS only because artificial vesicles lead to clot growth rates that are significantly lower than those of ErMPs at concentrations higher than  $500 \cdot 10^3/\mu\text{l}$ , and an increase in the PS content in artificial vesicles did not change the saturation level. Other components of phospholipid composition may determine ErMPs activity. Notably, ErMP concentrations could be underestimated due to their small size. Thus, the difference between ErMPs and PMPs can partially be accounted for by higher ErMPs concentrations, and the attainability of  $500 \cdot 10^3/\mu\text{l}$  ErMPs in physiological conditions is questionable.

A significant distinction of TF-bearing MPs is that there are concentrations at which MPs are able to induce some separate clots, but the growth of these clots stops in the first 10–15

min of a test. Previously, Oliver et al. concluded, by means of the thrombin generation test, that TF-bearing MPs participate in coagulation activation but not in coagulation propagation [59]. It is likely that clot growth stops when subthreshold activation leads to thrombin impulses that are rapidly inhibited by plasma inhibitors, and the lipid surface may not be enough to support coagulation propagation because these concentrations are quite low. Another reason for the growth termination of EMPs and MMPs induced clots could be thrombomodulin on the surfaces of endothelium and monocytes [60,61].

Summarizing the results, we can say that MPs derived from different cells play a qualitatively different role in coagulation activation and propagation: TF+ MMPs have a strong activating ability and have a very weak effect on coagulation propagation; on the contrary, contact activation from PMPs and ErMPs in normal plasma is weak, and these MPs, firstly, contribute coagulation propagation. Although an increased concentration of MPs is usually regarded as a risk of thrombosis, MPs that have weak activating capacity but support coagulation propagation in some cases can play a positive role, for example, by reducing blood loss during surgery or mitigating the clinical manifestations of haemophilia [62]. Endothelial MPs, although they have an intermediate activity, are able to make a significant contribution to both the activation and distribution of coagulation.

## Supporting information

**S1 Movie. Video of clots growing from activator and spontaneous clots in MP-depleted plasma supplemented with MPs of different origins in different concentrations.**

(PPTX)

**S1 Text. Kinetics of coagulation centres appearance.**

(DOCX)

**S1 Fig. Time dependence of the number of clotting centres induced by MPs of different origins.** The number of clotting centres was recalculated to represent what it would have been if the plasma volume had not been decreased by clots that appeared earlier (N corrected). Clotting was induced in normal MP-depleted plasma by supplementation with (A) platelet MPs, (B) erythrocyte MPs, (C) endothelial MPs, and (D) monocyte MPs. Different curves correspond to different MPs samples and different concentrations. Legends identify labels of MPs samples and the concentration used in the experiment.

(TIF)

**S2 Fig. The dependence of the number of clotting centres formed within 60 min on concentration.** Clotting was induced in normal MP-depleted plasma by supplementation with (A) platelet MPs, (B) erythrocyte MPs, (C) endothelial MPs, and (D) monocyte MPs. Legends identify labels of MPs samples.

(TIF)

**S3 Fig. Dependence of the time of the first 5 spontaneous clots appearances on time.** Data are represented for (A) platelet MPs, (B) erythrocyte MPs, (C) endothelial MPs, and (D) monocyte MPs. Dots correspond to individual tests, the mean values of  $t_{N=5}$  at different concentrations are connected with lines, and symbols of different types and colours correspond to different MPs samples.

(TIF)

**S4 Fig. Time dependence of light scattering intensity in the centre of spontaneous clots and clots growing from activator.** Clotting was induced in normal MP-depleted plasma by supplementation of (A) platelet MPs, (B) erythrocyte MPs, (C), (E), (G) endothelial MPs,

monocyte MPs, THP MPs respectively in conditionally “low” concentrations, (D), (F), (H) endothelial MPs, monocyte MPs, THP MPs respectively in conditionally “high” concentrations. Time dependence of the light scattering intensity of clots growing from activator are drawn with dashed lines, and those of the light scattering intensity in the centre of spontaneous clots are drawn with solid lines.

(TIF)

**S5 Fig. Comparison of the maximal light scattering intensity in the centres of spontaneous clots and of clots growing from activator.** The maximal light scattering intensity dependence on the concentration of (A) platelet MPs, (B) erythrocyte MPs, (C) endothelial MPs, (D) monocyte MPs and (E) THP MPs. The maximal light scattering intensity in the centres of spontaneous clots is denoted with opened symbols, and that of clots growing from activator is denoted with filled symbols.

(TIF)

**S6 Fig. Concentration dependence of the maximal light scattering intensity in the centres of spontaneous clots.** Data represent (A) platelet MPs, (B) erythrocyte MPs, (C) endothelial MPs, (D) monocyte MPs and (E) THP MPs. Dots correspond to individual tests, the mean values of VI at different concentrations are connected with lines, and symbols of different types and colours correspond to different MP samples.

(TIF)

**S7 Fig. Time dependences of clot growing from activator and spontaneous clots sizes.** Clotting was induced in normal MP-depleted plasma by supplementation (A) platelet MPs, (B) erythrocyte MPs, (C), (E), (G) endothelial MPs, monocyte MPs, THP MPs respectively in conditionally “low” concentrations, (D), (F), (H) endothelial MPs, monocyte MPs, THP MPs respectively in conditionally “high” concentrations. Time dependences of clots growing from activator sizes are drawn with dashed lines, and those of spontaneous clot sizes are drawn with solid lines.

(TIF)

**S8 Fig. Concentration dependence of the rate of coagulation front propagation from centres of spontaneous clots.** Data represent (A) platelet MPs, (B) erythrocyte MPs, (C) endothelial MPs, and (D) monocyte MPs. Dots correspond to individual tests, the mean values of VI at different concentrations are connected with lines, and symbols of different types and colours correspond to different MP samples.

(TIF)

**S9 Fig. Correlation of the rate of coagulation front propagation from centres of spontaneous clots and the maximal light scattering intensity in the centre of spontaneous clots growth rate correlation.** (A) Data are represented for platelet MPs, (B) erythrocyte MPs, (C) endothelial MPs, (D) monocyte MPs and (E) THP MPs.

(TIF)

**S10 Fig. Correlation of the rate of coagulation front propagation from centres of spontaneous clots and the lag time of clots appearance.** (A) Data are represented for platelet MPs, (B) erythrocyte MPs, (C) endothelial MPs, (D) monocyte MPs and (E) THP MPs.

(TIF)

## Acknowledgments

We thank Dr. Panteleev MA (Center for Theoretical Problems of Physicochemical Pharmacology, Moscow, Russia) for valuable discussions.

## Author Contributions

**Conceptualization:** E. N. Lipets, F. I. Ataulakhanov.

**Investigation:** E. N. Lipets, O. A. Antonova, O. N. Shustova, K. V. Losenkova.

**Methodology:** O. A. Antonova, O. N. Shustova, K. V. Losenkova.

**Supervision:** A. V. Mazurov, F. I. Ataulakhanov.

**Writing – original draft:** E. N. Lipets.

**Writing – review & editing:** E. N. Lipets, A. V. Mazurov, F. I. Ataulakhanov.

## References

1. Flaumenhaft R, Dilks JR, Richardson J, Alden E, Patel-Hett SR, Battinelli E, et al. Megakaryocyte-derived microparticles: direct visualization and distinction from platelet-derived microparticles. *Blood*. 2009; 113: 1112–1121. <https://doi.org/10.1182/blood-2008-06-163832> PMID: 18802008
2. Berckmans RJ, Nieuwland R, Boing AN, Romijn FP, Hack CE, Sturk A. Cell-derived microparticles circulate in healthy humans and support low grade thrombin generation. *Thromb Haemost*. 2001; 85: 639–646.
3. Owens AP, Mackman N. Microparticles in Hemostasis and Thrombosis. Weber C, Mause S, editors. *Circ Res*. 2011; 108: 1284–1297. <https://doi.org/10.1161/CIRCRESAHA.110.233056> PMID: 21566224
4. George FD. Microparticles in vascular diseases. *Thromb Res*. 2008; 122: S55–S59. [https://doi.org/10.1016/S0049-3848\(08\)70020-3](https://doi.org/10.1016/S0049-3848(08)70020-3)
5. Mooberry MJ, Key NS. Microparticle analysis in disorders of hemostasis and thrombosis. *Cytometry A*. 2016; 89: 111–22. <https://doi.org/10.1002/cyto.a.22647> PMID: 25704723
6. Vanwijk MJ, Vanbavel E, Sturk A, Nieuwland R. Microparticles in cardiovascular diseases. *Cardiovasc Res*. 2003; 59: 277–287.
7. Nomura S, Shimizu M. Clinical significance of procoagulant microparticles. *J Intensive Care*. 2015; 3: 2. <https://doi.org/10.1186/s40560-014-0066-z> PMID: 25705427
8. Herring JM, McMichael MA, Smith SA. Microparticles in Health and Disease. *J Vet Intern Med*. 2013; 27: 1020–1033. <https://doi.org/10.1111/jvim.12128> PMID: 23815149
9. Sun C, Zhao W-B, Chen Y, Hu H-Y. Higher Plasma Concentrations of Platelet Microparticles in Patients With Acute Coronary Syndrome: A Systematic Review and Meta-analysis. *Can J Cardiol*. 2016; 32: 1325.e1–1325.e10. <https://doi.org/10.1016/j.cjca.2016.02.052> PMID: 27177836
10. Cui Y, Zheng L, Jiang M, Jia R, Zhang X, Quan Q, et al. Circulating microparticles in patients with coronary heart disease and its correlation with interleukin-6 and C-reactive protein. *Mol Biol Rep*. 2013; 40: 6437–6442. <https://doi.org/10.1007/s11033-013-2758-1> PMID: 24078095
11. Mallat Z, Benamer H, Hugel B, Benessiano J, Steg PG, Freyssinet JM, et al. Elevated levels of shed membrane microparticles with procoagulant potential in the peripheral circulating blood of patients with acute coronary syndromes. *Circulation*. 2000; 101: 841–843. Available: <http://www.ncbi.nlm.nih.gov/pubmed/10694520>
12. Bernal-Mizrachi L, Jy W, Jimenez JJ, Pastor J, Mauro LM, Horstman LL, et al. High levels of circulating endothelial microparticles in patients with acute coronary syndromes. *Am Heart J*. 2003; 145: 962–970. [https://doi.org/10.1016/S0002-8703\(03\)00103-0](https://doi.org/10.1016/S0002-8703(03)00103-0)
13. Zwicker JI, Liebman HA, Neuberg D, Lacroix R, Bauer KA, Furie BC, et al. Tumor-derived tissue factor-bearing microparticles are associated with venous thromboembolic events in malignancy. *Clin Cancer Res*. 2009; 15: 6830–6840. <https://doi.org/10.1158/1078-0432.CCR-09-0371> PMID: 19861441
14. Campello E, Spiezia L, Radu CM, Bulato C, Castelli M, Gavasso S, et al. Endothelial, platelet, and tissue factor-bearing microparticles in cancer patients with and without venous thromboembolism. *Thromb Res*. 2011; 127: 473–477. <https://doi.org/10.1016/j.thromres.2011.01.002> PMID: 21256535
15. Tesselaar MET, Romijn FP, Van Der Linden IK, Bertina RM, Osanto S. Microparticle-associated tissue factor activity in cancer patients with and without thrombosis. *J Thromb Haemost*. 2009; 7: 1421–1423. <https://doi.org/10.1111/j.1538-7836.2009.03504.x> PMID: 19500241
16. Manly DA, Wang J, Glover SL, Kasthuri R, Liebman HA, Key NS, et al. Increased microparticle tissue factor activity in cancer patients with Venous Thromboembolism. *Thromb Res*. 2010; 125: 511–2. <https://doi.org/10.1016/j.thromres.2009.09.019> PMID: 19854471

17. Campello E, Spiezia L, Radu CM, Simioni P. Microparticles as biomarkers of venous thromboembolic events. *Biomark Med*. 2016; 10: 743–755. <https://doi.org/10.2217/bmm-2015-0063> PMID: 27338783
18. Nozaki T, Sugiyama S, Sugamura K, Ohba K, Matsuzawa Y, Konishi M, et al. Prognostic value of endothelial microparticles in patients with heart failure. *Eur J Heart Fail*. 2010; 12: 1223–1228. <https://doi.org/10.1093/eurjhf/hfq145> PMID: 20817695
19. Amabile N, Guerin AP, Tedgui A, Boulanger CM, London GM. Predictive value of circulating endothelial microparticles for cardiovascular mortality in end-stage renal failure: a pilot study. *Nephrol Dial Transplant*. 2012; 27: 1873–1880. <https://doi.org/10.1093/ndt/gfr573> PMID: 22036944
20. Koga H, Sugiyama S, Kugiyama K, Watanabe K, Fukushima H, Tanaka T, et al. Elevated Levels of VE-Cadherin-Positive Endothelial Microparticles in Patients With Type 2 Diabetes Mellitus and Coronary Artery Disease. *J Am Coll Cardiol*. 2005; 45: 1622–1630. <https://doi.org/10.1016/J.JACC.2005.02.047> PMID: 15893178
21. Sinauridze EI, Kireev DA, Popenko NY, Pichugin A V, Panteleev MA, Krymskaya O V, et al. Platelet microparticle membranes have 50- to 100-fold higher specific procoagulant activity than activated platelets. *Thromb Haemost*. 2007; 97: 425–434. Available: <http://www.ncbi.nlm.nih.gov/pubmed/17334510>
22. Gilbert GE, Sims PJ, Wiedmer T, Furie B, Furie BC, Shattil SJ. Platelet-derived microparticles express high affinity receptors for factor VIII. *J Biol Chem*. 1991; 266: 17261–17268.
23. Sims PJ, Faioni EM, Wiedmer T, Shattil SJ. Complement proteins C5b-9 cause release of membrane vesicles from the platelet surface that are enriched in the membrane receptor for coagulation factor Va and express prothrombinase activity. *J Biol Chem*. 1988; 263: 18205–18212.
24. Aleman MM, Gardiner C, Harrison P, Wolberg AS. Differential contributions of monocyte- and platelet-derived microparticles towards thrombin generation and fibrin formation and stability. *J Thromb Haemost*. 2011; 9: 2251–2261. <https://doi.org/10.1111/j.1538-7836.2011.04488.x> PMID: 21883880
25. Tripisciano C, Weiss R, Eichhorn T, Spittler A, Heuser T, Fischer MB, et al. Different Potential of Extracellular Vesicles to Support Thrombin Generation: Contributions of Phosphatidylserine, Tissue Factor, and Cellular Origin. *Sci Rep*. 2017; 7: 6522. <https://doi.org/10.1038/s41598-017-03262-2> PMID: 28747771
26. van der Meijden PEJ, van Schilfgaarde M, van Oerle R, Renné T, ten Cate H, Spronk HMH. Platelet- and erythrocyte-derived microparticles trigger thrombin generation via factor XIIa. *J Thromb Haemost*. 2012; 10: 1355–1362. <https://doi.org/10.1111/j.1538-7836.2012.04758.x> PMID: 22537188
27. Rubin O, Delobel J, Prudent M, Lion N, Kohl K, Tucker EI, et al. Red blood cell-derived microparticles isolated from blood units initiate and propagate thrombin generation. *Transfusion*. 2013; 53: 1744–1754. <https://doi.org/10.1111/trf.12008> PMID: 23228139
28. Khaspekova SG, Antonova OA, Shustova ON, Yakushkin V V., Golubeva N V., Titaeva E V., et al. Activity of tissue factor in microparticles produced in vitro by endothelial cells, monocytes, granulocytes, and platelets. *Biochem*. 2016; 81: 114–121. <https://doi.org/10.1134/S000629791602005X> PMID: 27260391
29. Shustova ON, Antonova OA, Golubeva N V., Khaspekova SG, Yakushkin V V., Aksuk SA, et al. Differential procoagulant activity of microparticles derived from monocytes, granulocytes, platelets and endothelial cells. *Blood Coagul Fibrinolysis*. 2017; 28: 373–382. <https://doi.org/10.1097/MBC.0000000000000609> PMID: 27926582
30. Antonova OA, Shustova ON, Yakushkin V V, Alchinova IB, Karganov MY, Mazurov A V. Coagulation properties of erythrocyte derived membrane microparticles. *Biochem Suppl Ser B Biomed Chem*. 2019; 13: 237–243. <https://doi.org/10.1134/S1990750819030028>
31. Khaspekova SG, Antonova OA, Shustova ON, Yakushkin V V., Golubeva N V., Titaeva E V., et al. Activity of tissue factor in microparticles produced in vitro by endothelial cells, monocytes, granulocytes, and platelets. *Biochem*. 2016; 81: 114–121. <https://doi.org/10.1134/S000629791602005X> PMID: 27260391
32. Antonov AS, Nikolaeva MA, Klueva TS, Romanov YuA, Babaev VR, Bystrevskaya VB, et al. Primary culture of endothelial cells from atherosclerotic human aorta. Part 1. Identification, morphological and ultrastructural characteristics of two endothelial cell subpopulations. *Atherosclerosis*. 1986; 59: 1–19. Available: <http://www.ncbi.nlm.nih.gov/pubmed/3004520>
33. Van Der Meijden PE, Van Schilfgaarde M, Van Oerle R, Renne T, ten Cate H, Spronk HM. Platelet- and erythrocyte-derived microparticles trigger thrombin generation via factor XIIa. *J Thromb Haemost*. 2012/04/28. 2012; 10: 1355–1362. <https://doi.org/10.1111/j.1538-7836.2012.04758.x> PMID: 22537188
34. Dashkevich NM, Vuimo TA, Ovsepyan RA, Surov SS, Soshitova NP, Panteleev MA, et al. Effect of Pre-Analytical Conditions on the Thrombodynamics Assay. *Thromb Res*. 2014; 133: 472–476. <https://doi.org/10.1016/J.THROMRES.2013.12.014> PMID: 24369827
35. Ovanesov M V., Panteleev MA, Sinauridze EI, Kireev DA, Plyushch OP, Kopylov KG, et al. Mechanisms of action of recombinant activated factor VII in the context of tissue factor concentration and distribution.

- Blood Coagul Fibrinolysis. 2008; 19: 743–755. <https://doi.org/10.1097/MBC.0b013e3283104093> PMID: 19002040
36. Lipets E, Vlasova O, Urnova E, Margolin O, Soloveva A, Ostapushchenko O, et al. Circulating contact-pathway-activating microparticles together with factors IXa and XIa induce spontaneous clotting in plasma of hematology and cardiologic patients. *PLoS One*. 2014; 9: e87692. <https://doi.org/10.1371/journal.pone.0087692> PMID: 24498168
  37. Sinauridze EI, Vuimo TA, Tarandovskiy ID, Ovsepyan RA, Surov SS, Korotina NG, et al. Thrombodynamics, a new global coagulation test: Measurement of heparin efficiency. *Talanta*. 2018; 180: 282–291. <https://doi.org/10.1016/j.talanta.2017.12.055> PMID: 29332812
  38. Ovanesov M V, Krasotkina J V, Ul'yanova LI, Abushinova K V, Plyushch OP, Domogatskii SP, et al. Hemophilia A and B are associated with abnormal spatial dynamics of clot growth. *Biochim Biophys Acta—Gen Subj*. 2002; 1572: 45–57. [https://doi.org/10.1016/S0304-4165\(02\)00278-7](https://doi.org/10.1016/S0304-4165(02)00278-7)
  39. Soshitova NP, Karamzin SS, Balandina AN, Fadeeva OA, Kretchetova A V., Galstian GM, et al. Predicting prothrombotic tendencies in sepsis using spatial clot growth dynamics. *Blood Coagul Fibrinolysis*. 2012; 23: 498–507. <https://doi.org/10.1097/MBC.0b013e328352e90e> PMID: 22688554
  40. Vasilenko I, Vlasova E, Metelin V, Balkanov A, Bichenkov O. PO-22—Thrombodynamics test for analysis of hemostasis in patients with malignant tumors and predicting thrombotic complications. *Thromb Res*. 2016; 140 Suppl 1: S184. [https://doi.org/10.1016/S0049-3848\(16\)30155-4](https://doi.org/10.1016/S0049-3848(16)30155-4)
  41. Gracheva MA, Urnova ES, Sinauridze EI, Tarandovskiy ID, Orel EB, Poletaev A V., et al. Thromboelastography, thrombin generation test and thrombodynamics reveal hypercoagulability in patients with multiple myeloma. *Leuk Lymphoma*. 2015; 56: 3418–3425. <https://doi.org/10.3109/10428194.2015.1041385> PMID: 25907422
  42. Balandina AN, Serebriyskiy II, Poletaev A V, Polokhov DM, Gracheva MA, Koltsova EM, et al. Thrombodynamics-A new global hemostasis assay for heparin monitoring in patients under the anticoagulant treatment. *PLoS One*. 2018; 13: e0199900. <https://doi.org/10.1371/journal.pone.0199900> PMID: 29953528
  43. Balandina AN, Koltsova EM, Teterina TA, Yakovenko AG, Simonenko EU, Poletaev A V., et al. An enhanced clot growth rate before in vitro fertilization decreases the probability of pregnancy. *PLoS One*. 2019; 14: e0216724. <https://doi.org/10.1371/journal.pone.0216724> PMID: 31120933
  44. Arnljots B, Ezban M, Hedner U. Prevention of experimental arterial thrombosis by topical administration of active site-inactivated factor VIIa. *J Vasc Surg*. 1997; 25: 341–6. Available: <http://www.ncbi.nlm.nih.gov/pubmed/9052569>
  45. Weisel JW, Nagaswami C. Computer modeling of fibrin polymerization kinetics correlated with electron microscope and turbidity observations: clot structure and assembly are kinetically controlled. *Biophys J*. 1992; 63: 111–28. [https://doi.org/10.1016/S0006-3495\(92\)81594-1](https://doi.org/10.1016/S0006-3495(92)81594-1) PMID: 1420861
  46. Dashkevich NM, Ovanesov M V, Balandina AN, Karamzin SS, Shestakov PI, Soshitova NP, et al. Thrombin activity propagates in space during blood coagulation as an excitation wave. *Biophys J*. 2012; 103: 2233–40. <https://doi.org/10.1016/j.bpj.2012.10.011> PMID: 23200057
  47. Ovanesov M V., Ananyeva NM, Pantelev MA, Ataullakhanov FI, Saenko EL. Initiation and propagation of coagulation from tissue factor-bearing cell monolayers to plasma: initiator cells do not regulate spatial growth rate. *J Thromb Haemost*. 2005; 3: 321–331. <https://doi.org/10.1111/j.1538-7836.2005.01128.x> PMID: 15670039
  48. Owen JS, Hutton RA, Day RC, Bruckdorfer KR, McIntyre N. Platelet lipid composition and platelet aggregation in human liver disease. *J Lipid Res*. 1981; 22: 423–30. Available: <http://www.ncbi.nlm.nih.gov/pubmed/7240967>
  49. Dougherty RM, Galli C, Ferro-Luzzi A, Iacono JM. Lipid and phospholipid fatty acid composition of plasma, red blood cells, and platelets and how they are affected by dietary lipids: a study of normal subjects from Italy, Finland, and the USA. *Am J Clin Nutr*. 1987; 45: 443–455. <https://doi.org/10.1093/ajcn/45.2.443> PMID: 3812343
  50. Hamid M, Kunicki T, Aster R. Lipid composition of freshly prepared and stored platelet concentrates. *Blood*. 1980; 55: 124–130.
  51. Douste-Blazy L, Chap H, Gautheron P. Platelet lipid composition. *Haemostasis*. 1973; 2: 85–91. <https://doi.org/10.1159/000214009> PMID: 4790828
  52. Cohen P, Derksen A. Comparison of Phospholipid and Fatty Acid Composition of Human Erythrocytes and Platelets. *Br J Haematol*. 1969; 17: 359–371. <https://doi.org/10.1111/j.1365-2141.1969.tb01382.x> PMID: 5346409
  53. Alchinova IB, Khaspekova SG, Golubeva N V, Shustova ON, Antonova OA, Karganov MY, et al. Comparison of the size of membrane microparticles of different cellular origin by dynamic light scattering. *Dokl Biochem Biophys*. 2016; 470: 322–325. <https://doi.org/10.1134/S1607672916050045> PMID: 27817018

54. Marques FK, Campos FMF, Filho OAM, Carvalho AT, Dusse LMS, Gomes KB. Circulating microparticles in severe preeclampsia. *Clin Chim Acta*. 2012; 414: 253–258. <https://doi.org/10.1016/J.CCA.2012.09.023> PMID: 23041217
55. Tripodi A, Branchi A, Chantarangkul V, Clerici M, Merati G, Artoni A, et al. Hypercoagulability in patients with type 2 diabetes mellitus detected by a thrombin generation assay. *J Thromb Thrombolysis*. 2011; 31: 165–172. <https://doi.org/10.1007/s11239-010-0506-0> PMID: 20640482
56. Arraud N, Gounou C, Turpin D, Brisson AR. Fluorescence triggering: A general strategy for enumerating and phenotyping extracellular vesicles by flow cytometry. *Cytom Part A*. 2016; 89: 184–195. <https://doi.org/10.1002/cyto.a.22669> PMID: 25857288
57. Chandler WL, Yeung W, Tait JF. A new microparticle size calibration standard for use in measuring smaller microparticles using a new flow cytometer. *J Thromb Haemost*. 2011; 9: 1216–24. <https://doi.org/10.1111/j.1538-7836.2011.04283.x> PMID: 21481178
58. Kastrup CJ, Runyon MK, Shen F, Ismagilov RF. Modular chemical mechanism predicts spatiotemporal dynamics of initiation in the complex network of hemostasis. *Proc Natl Acad Sci U S A*. 2006; 103: 15747–52. <https://doi.org/10.1073/pnas.0605560103> PMID: 17043240
59. Ollivier V, Wang J, Manly D, Machlus KR, Wolberg AS, Jandrot-Perrus M, et al. Detection of endogenous tissue factor levels in plasma using the calibrated automated thrombogram assay. *Thromb Res*. 2010; 125: 90–96. <https://doi.org/10.1016/j.thromres.2009.03.003> PMID: 19345399
60. Satta N, Freyssinet J-M, Toti F. The significance of human monocyte thrombomodulin during membrane vesiculation and after stimulation by lipopolysaccharide. *Br J Haematol*. 1997; 96: 534–542. <https://doi.org/10.1046/j.1365-2141.1997.d01-2059.x> PMID: 9054661
61. Lacroix R, Dubois C, Leroyer AS, Sabatier F, Dignat-George F. Revisited role of microparticles in arterial and venous thrombosis. *J Thromb Haemost*. 2013; 11: 24–35. <https://doi.org/10.1111/jth.12268> PMID: 23809108
62. Horstman LL, McCauley RF, Jy W, Ahn YS. Tissue Factor-Negative Cell-Derived Microparticles Play a Distinctive Role in Hemostasis: A Viewpoint Review. *Semin Thromb Hemost*. 2019; 45: 509–513. <https://doi.org/10.1055/s-0039-1688570> PMID: 31195421
